# Supplementary material
Source: Research Square preprint supplement (doi:10.21203/rs.3.rs-9087623/v1)
Supplement: Supplementary file 1 [file d12edc5ca6176f4cc8a3f626.docx]

**Supplemental Files:**

Supplemental Table 1: Renal Failure and Malignant Neoplasm-related mortalities in older adults in the United States, 1999 to 2020, demographics table

| **Year** | **Overall** | **Women** | **Men** | **NH Whites** | **Hispanic** | **American Indian or Alaska Native** | **Asians or Pacific Islanders** | **NH Blacks** | **Population** |
| --- | --- | --- | --- | --- | --- | --- | --- | --- | --- |
| **1999** | 17625 | 6906 | 10719 | 14258 | 767 | 72 | 328 | 2967 | 95153686 |
| **2000** | 18452 | 7322 | 11130 | 14855 | 822 | 87 | 396 | 3114 | 96944389 |
| **2001** | 18791 | 7440 | 11351 | 15043 | 869 | 87 | 402 | 3259 | 99781854 |
| **2002** | 19704 | 7789 | 11915 | 15899 | 977 | 80 | 415 | 3310 | 102217733 |
| **2003** | 20533 | 8093 | 12440 | 16682 | 986 | 101 | 464 | 3286 | 104692428 |
| **2004** | 21027 | 8351 | 12676 | 17081 | 1030 | 99 | 488 | 3359 | 107138553 |
| **2005** | 21733 | 8469 | 13264 | 17611 | 1251 | 99 | 523 | 3500 | 109787199 |
| **2006** | 21582 | 8535 | 13047 | 17458 | 1218 | 132 | 545 | 3447 | 112380379 |
| **2007** | 21947 | 8665 | 13282 | 17756 | 1320 | 135 | 530 | 3526 | 114894084 |
| **2008** | 21369 | 8467 | 12902 | 17292 | 1263 | 142 | 568 | 3367 | 117395131 |
| **2009** | 21694 | 8614 | 13080 | 17545 | 1301 | 112 | 561 | 3476 | 119895863 |
| **2010** | 22090 | 8618 | 13472 | 17691 | 1381 | 132 | 619 | 3648 | 121757429 |
| **2011** | 26756 | 10677 | 16079 | 21336 | 1703 | 149 | 781 | 4490 | 124174484 |
| **2012** | 27203 | 10981 | 16222 | 21715 | 1773 | 179 | 846 | 4463 | 126000296 |
| **2013** | 21659 | 8641 | 13018 | 17348 | 1396 | 140 | 622 | 3549 | 127788037 |
| **2014** | 22023 | 8790 | 13233 | 17710 | 1515 | 131 | 683 | 3499 | 129779643 |
| **2015** | 22017 | 8630 | 13387 | 17734 | 1562 | 155 | 661 | 3467 | 131826832 |
| **2016** | 22567 | 9019 | 13548 | 18189 | 1604 | 141 | 680 | 3557 | 133494018 |
| **2017** | 23125 | 9233 | 13892 | 18507 | 1812 | 137 | 772 | 3709 | 135229289 |
| **2018** | 23315 | 9276 | 14039 | 18825 | 1828 | 146 | 773 | 3571 | 136335528 |
| **2019** | 24007 | 9627 | 14380 | 19163 | 1875 | 164 | 791 | 3889 | 137381702 |
| **2020** | 24519 | 9848 | 14671 | 19616 | 1920 | 176 | 845 | 3882 | 138429175 |
| **Total** | 483738 | 191991 | 291747 | 389314 | 30173 | 2796 | 13293 | 78335 | 2622477732 |

Supplemental Table 2: Renal Failure and Malignant Neoplasm-related mortalities in older adults in the United States, 1999 to 2020, stratified by place of death

| **Place of Death** | **Deaths** | **% of Total Deaths** |
| --- | --- | --- |
| Medical Facility - Inpatient | 264183 | 54.60% |
| Medical Facility - Outpatient or ER | 8234 | 1.70% |
| Medical Facility - Dead on Arrival | 586 | 0.10% |
| Medical Facility - Status unknown | 406 | 0.10% |
| Decedent's home | 103877 | 21.50% |
| Hospice facility | 25099 | 5.20% |
| Nursing home/long term care | 65258 | 13.50% |
| Other | 15026 | 3.10% |
| Place of death unknown | 1069 | 0.20% |
| Totals | 483738 | 100.00% |

Supplemental Table 3: Renal Failure and Malignant Neoplasm-related mortalities in older adults in the United States, 1999 to 2020, stratified by sex

| **Sex** | **Year** | **Age Adjusted Rate** | **Age Adjusted Rate Lower 95% Confidence Interval** | **Age Adjusted Rate Upper 95% Confidence Interval** | **Age Adjusted Rate Standard Error** |
| --- | --- | --- | --- | --- | --- |
| Female | 1999 | 12.4 | 12.1 | 12.7 | 0.1 |
| Female | 2000 | 13 | 12.7 | 13.3 | 0.2 |
| Female | 2001 | 13 | 12.7 | 13.3 | 0.2 |
| Female | 2002 | 13.4 | 13.1 | 13.7 | 0.2 |
| Female | 2003 | 13.7 | 13.4 | 14 | 0.2 |
| Female | 2004 | 13.9 | 13.6 | 14.2 | 0.2 |
| Female | 2005 | 13.9 | 13.6 | 14.2 | 0.2 |
| Female | 2006 | 13.8 | 13.5 | 14.1 | 0.2 |
| Female | 2007 | 13.8 | 13.5 | 14.1 | 0.1 |
| Female | 2008 | 13.3 | 13 | 13.6 | 0.1 |
| Female | 2009 | 13.2 | 12.9 | 13.5 | 0.1 |
| Female | 2010 | 13.1 | 12.8 | 13.4 | 0.1 |
| Female | 2011 | 15.7 | 15.4 | 16 | 0.2 |
| Female | 2012 | 15.8 | 15.5 | 16.1 | 0.2 |
| Female | 2013 | 12.2 | 12 | 12.5 | 0.1 |
| Female | 2014 | 12.2 | 11.9 | 12.4 | 0.1 |
| Female | 2015 | 11.7 | 11.4 | 11.9 | 0.1 |
| Female | 2016 | 12 | 11.7 | 12.2 | 0.1 |
| Female | 2017 | 12 | 11.7 | 12.2 | 0.1 |
| Female | 2018 | 11.8 | 11.5 | 12 | 0.1 |
| Female | 2019 | 12 | 11.7 | 12.2 | 0.1 |
| Female | 2020 | 12.1 | 11.8 | 12.3 | 0.1 |
| Male | 1999 | 28.7 | 28.2 | 29.3 | 0.3 |
| Male | 2000 | 29.4 | 28.8 | 29.9 | 0.3 |
| Male | 2001 | 29.2 | 28.6 | 29.7 | 0.3 |
| Male | 2002 | 30.2 | 29.6 | 30.8 | 0.3 |
| Male | 2003 | 30.7 | 30.2 | 31.3 | 0.3 |
| Male | 2004 | 30.6 | 30.1 | 31.2 | 0.3 |
| Male | 2005 | 31.3 | 30.8 | 31.9 | 0.3 |
| Male | 2006 | 30 | 29.4 | 30.5 | 0.3 |
| Male | 2007 | 29.8 | 29.3 | 30.3 | 0.3 |
| Male | 2008 | 28 | 27.5 | 28.5 | 0.3 |
| Male | 2009 | 27.7 | 27.2 | 28.2 | 0.2 |
| Male | 2010 | 27.9 | 27.4 | 28.4 | 0.2 |
| Male | 2011 | 32.4 | 31.9 | 33 | 0.3 |
| Male | 2012 | 31.8 | 31.3 | 32.3 | 0.3 |
| Male | 2013 | 24.6 | 24.2 | 25 | 0.2 |
| Male | 2014 | 24.2 | 23.8 | 24.7 | 0.2 |
| Male | 2015 | 23.8 | 23.4 | 24.2 | 0.2 |
| Male | 2016 | 23.5 | 23.1 | 24 | 0.2 |
| Male | 2017 | 23.4 | 23 | 23.8 | 0.2 |
| Male | 2018 | 23 | 22.6 | 23.4 | 0.2 |
| Male | 2019 | 23 | 22.6 | 23.4 | 0.2 |
| Male | 2020 | 23 | 22.6 | 23.3 | 0.2 |
| Overall | 1999 | 18.5 | 18.3 | 18.8 | 0.1 |
| Overall | 2000 | 19.1 | 18.9 | 19.4 | 0.1 |
| Overall | 2001 | 19.2 | 18.9 | 19.4 | 0.1 |
| Overall | 2002 | 19.8 | 19.5 | 20 | 0.1 |
| Overall | 2003 | 20.3 | 20 | 20.5 | 0.1 |
| Overall | 2004 | 20.4 | 20.1 | 20.7 | 0.1 |
| Overall | 2005 | 20.7 | 20.4 | 21 | 0.1 |
| Overall | 2006 | 20.2 | 19.9 | 20.4 | 0.1 |
| Overall | 2007 | 20.1 | 19.8 | 20.4 | 0.1 |
| Overall | 2008 | 19.1 | 18.9 | 19.4 | 0.1 |
| Overall | 2009 | 19 | 18.8 | 19.3 | 0.1 |
| Overall | 2010 | 19 | 18.8 | 19.3 | 0.1 |
| Overall | 2011 | 22.5 | 22.2 | 22.8 | 0.1 |
| Overall | 2012 | 22.3 | 22 | 22.6 | 0.1 |
| Overall | 2013 | 17.3 | 17.1 | 17.5 | 0.1 |
| Overall | 2014 | 17.2 | 16.9 | 17.4 | 0.1 |
| Overall | 2015 | 16.7 | 16.5 | 17 | 0.1 |
| Overall | 2016 | 16.8 | 16.6 | 17 | 0.1 |
| Overall | 2017 | 16.8 | 16.6 | 17 | 0.1 |
| Overall | 2018 | 16.5 | 16.3 | 16.7 | 0.1 |
| Overall | 2019 | 16.7 | 16.4 | 16.9 | 0.1 |
| Overall | 2020 | 16.7 | 16.5 | 16.9 | 0.1 |

Supplemental Table 4: Renal Failure and Malignant Neoplasm-related mortalities in older adults in the United States, 1999 to 2020, stratified by race/ethnicity

| **Race** | **Year** | **Age Adjusted Rate** | **Age Adjusted Rate Lower 95% Confidence Interval** | **Age Adjusted Rate Upper 95% Confidence Interval** | **Age Adjusted Rate Standard Error** |
| --- | --- | --- | --- | --- | --- |
| American Indian or Alaska Native | 1999 | 15.5 | 11.9 | 19.8 | 1.9 |
| American Indian or Alaska Native | 2000 | 19 | 15.1 | 23.6 | 2.1 |
| American Indian or Alaska Native | 2001 | 17.1 | 13.5 | 21.3 | 1.9 |
| American Indian or Alaska Native | 2002 | 14.2 | 11.1 | 17.9 | 1.7 |
| American Indian or Alaska Native | 2003 | 19 | 15.1 | 22.9 | 2 |
| American Indian or Alaska Native | 2004 | 17.6 | 14.1 | 21.7 | 1.9 |
| American Indian or Alaska Native | 2005 | 16.4 | 13.2 | 20.3 | 1.8 |
| American Indian or Alaska Native | 2006 | 20 | 16.3 | 23.6 | 1.9 |
| American Indian or Alaska Native | 2007 | 19.5 | 16 | 23.1 | 1.8 |
| American Indian or Alaska Native | 2008 | 20.4 | 16.7 | 24 | 1.8 |
| American Indian or Alaska Native | 2009 | 14.3 | 11.5 | 17.2 | 1.5 |
| American Indian or Alaska Native | 2010 | 16.1 | 13.1 | 19 | 1.5 |
| American Indian or Alaska Native | 2011 | 19 | 15.8 | 22.3 | 1.7 |
| American Indian or Alaska Native | 2012 | 20.4 | 17.2 | 23.6 | 1.6 |
| American Indian or Alaska Native | 2013 | 15.1 | 12.4 | 17.8 | 1.4 |
| American Indian or Alaska Native | 2014 | 13.2 | 10.8 | 15.6 | 1.2 |
| American Indian or Alaska Native | 2015 | 14.8 | 12.3 | 17.3 | 1.3 |
| American Indian or Alaska Native | 2016 | 12.8 | 10.6 | 15 | 1.1 |
| American Indian or Alaska Native | 2017 | 12.1 | 10 | 14.3 | 1.1 |
| American Indian or Alaska Native | 2018 | 12.1 | 10 | 14.2 | 1.1 |
| American Indian or Alaska Native | 2019 | 12.9 | 10.8 | 14.9 | 1 |
| American Indian or Alaska Native | 2020 | 13.2 | 11.2 | 15.3 | 1 |
| Asian or Pacific Islander | 1999 | 14.6 | 13 | 16.3 | 0.8 |
| Asian or Pacific Islander | 2000 | 16.6 | 14.9 | 18.3 | 0.9 |
| Asian or Pacific Islander | 2001 | 15.1 | 13.5 | 16.6 | 0.8 |
| Asian or Pacific Islander | 2002 | 14.6 | 13.2 | 16.1 | 0.8 |
| Asian or Pacific Islander | 2003 | 16 | 14.5 | 17.5 | 0.8 |
| Asian or Pacific Islander | 2004 | 15.8 | 14.3 | 17.2 | 0.7 |
| Asian or Pacific Islander | 2005 | 15.8 | 14.4 | 17.2 | 0.7 |
| Asian or Pacific Islander | 2006 | 15.5 | 14.2 | 16.9 | 0.7 |
| Asian or Pacific Islander | 2007 | 14.8 | 13.5 | 16.1 | 0.7 |
| Asian or Pacific Islander | 2008 | 14.8 | 13.5 | 16 | 0.6 |
| Asian or Pacific Islander | 2009 | 13.7 | 12.5 | 14.9 | 0.6 |
| Asian or Pacific Islander | 2010 | 14.4 | 13.2 | 15.6 | 0.6 |
| Asian or Pacific Islander | 2011 | 17.1 | 15.9 | 18.3 | 0.6 |
| Asian or Pacific Islander | 2012 | 17.6 | 16.4 | 18.8 | 0.6 |
| Asian or Pacific Islander | 2013 | 12 | 11 | 12.9 | 0.5 |
| Asian or Pacific Islander | 2014 | 12.2 | 11.3 | 13.2 | 0.5 |
| Asian or Pacific Islander | 2015 | 10.8 | 10 | 11.7 | 0.4 |
| Asian or Pacific Islander | 2016 | 10.6 | 9.8 | 11.4 | 0.4 |
| Asian or Pacific Islander | 2017 | 11.7 | 10.8 | 12.5 | 0.4 |
| Asian or Pacific Islander | 2018 | 11 | 10.2 | 11.7 | 0.4 |
| Asian or Pacific Islander | 2019 | 10.8 | 10 | 11.5 | 0.4 |
| Asian or Pacific Islander | 2020 | 10.9 | 10.1 | 11.6 | 0.4 |
| Black or African American | 1999 | 36.3 | 35 | 37.6 | 0.7 |
| Black or African American | 2000 | 37.5 | 36.2 | 38.8 | 0.7 |
| Black or African American | 2001 | 38.3 | 37 | 39.7 | 0.7 |
| Black or African American | 2002 | 38.2 | 36.9 | 39.5 | 0.7 |
| Black or African American | 2003 | 37.2 | 35.9 | 38.5 | 0.7 |
| Black or African American | 2004 | 37.1 | 35.8 | 38.4 | 0.7 |
| Black or African American | 2005 | 37.5 | 36.2 | 38.8 | 0.6 |
| Black or African American | 2006 | 35.8 | 34.5 | 37 | 0.6 |
| Black or African American | 2007 | 35.3 | 34.1 | 36.5 | 0.6 |
| Black or African American | 2008 | 32.8 | 31.7 | 34 | 0.6 |
| Black or African American | 2009 | 32.7 | 31.6 | 33.8 | 0.6 |
| Black or African American | 2010 | 33.7 | 32.5 | 34.8 | 0.6 |
| Black or African American | 2011 | 39.9 | 38.7 | 41.1 | 0.6 |
| Black or African American | 2012 | 38.5 | 37.4 | 39.7 | 0.6 |
| Black or African American | 2013 | 29.2 | 28.3 | 30.2 | 0.5 |
| Black or African American | 2014 | 27.7 | 26.7 | 28.6 | 0.5 |
| Black or African American | 2015 | 26.4 | 25.5 | 27.3 | 0.5 |
| Black or African American | 2016 | 26.3 | 25.4 | 27.2 | 0.5 |
| Black or African American | 2017 | 26.3 | 25.4 | 27.2 | 0.4 |
| Black or African American | 2018 | 24.6 | 23.8 | 25.5 | 0.4 |
| Black or African American | 2019 | 26 | 25.2 | 26.8 | 0.4 |
| Black or African American | 2020 | 25.4 | 24.6 | 26.2 | 0.4 |
| White | 1999 | 16.9 | 16.6 | 17.2 | 0.1 |
| White | 2000 | 17.4 | 17.1 | 17.7 | 0.1 |
| White | 2001 | 17.4 | 17.1 | 17.7 | 0.1 |
| White | 2002 | 18.1 | 17.8 | 18.4 | 0.1 |
| White | 2003 | 18.7 | 18.4 | 19 | 0.1 |
| White | 2004 | 18.9 | 18.6 | 19.2 | 0.1 |
| White | 2005 | 19.2 | 18.9 | 19.5 | 0.1 |
| White | 2006 | 18.7 | 18.4 | 19 | 0.1 |
| White | 2007 | 18.7 | 18.4 | 18.9 | 0.1 |
| White | 2008 | 17.8 | 17.6 | 18.1 | 0.1 |
| White | 2009 | 17.8 | 17.5 | 18.1 | 0.1 |
| White | 2010 | 17.7 | 17.4 | 18 | 0.1 |
| White | 2011 | 20.8 | 20.6 | 21.1 | 0.1 |
| White | 2012 | 20.7 | 20.4 | 21 | 0.1 |
| White | 2013 | 16.2 | 15.9 | 16.4 | 0.1 |
| White | 2014 | 16.2 | 15.9 | 16.4 | 0.1 |
| White | 2015 | 15.8 | 15.6 | 16.1 | 0.1 |
| White | 2016 | 16 | 15.7 | 16.2 | 0.1 |
| White | 2017 | 15.9 | 15.7 | 16.1 | 0.1 |
| White | 2018 | 15.8 | 15.6 | 16 | 0.1 |
| White | 2019 | 15.8 | 15.6 | 16 | 0.1 |
| White | 2020 | 15.9 | 15.7 | 16.2 | 0.1 |
| Hispanic or Latino | 1999 | 16.2 | 15 | 17.4 | 0.6 |
| Hispanic or Latino | 2000 | 16.7 | 15.5 | 17.9 | 0.6 |
| Hispanic or Latino | 2001 | 16.3 | 15.2 | 17.4 | 0.6 |
| Hispanic or Latino | 2002 | 17.4 | 16.3 | 18.6 | 0.6 |
| Hispanic or Latino | 2003 | 17 | 15.9 | 18.1 | 0.6 |
| Hispanic or Latino | 2004 | 16.8 | 15.8 | 17.9 | 0.5 |
| Hispanic or Latino | 2005 | 19.2 | 18.1 | 20.3 | 0.6 |
| Hispanic or Latino | 2006 | 17.6 | 16.6 | 18.6 | 0.5 |
| Hispanic or Latino | 2007 | 18.3 | 17.3 | 19.4 | 0.5 |
| Hispanic or Latino | 2008 | 16.4 | 15.5 | 17.4 | 0.5 |
| Hispanic or Latino | 2009 | 16.1 | 15.2 | 17 | 0.5 |
| Hispanic or Latino | 2010 | 16.2 | 15.3 | 17.1 | 0.5 |
| Hispanic or Latino | 2011 | 19.1 | 18.1 | 20 | 0.5 |
| Hispanic or Latino | 2012 | 18.7 | 17.8 | 19.6 | 0.5 |
| Hispanic or Latino | 2013 | 13.9 | 13.2 | 14.7 | 0.4 |
| Hispanic or Latino | 2014 | 13.9 | 13.1 | 14.6 | 0.4 |
| Hispanic or Latino | 2015 | 13.8 | 13 | 14.5 | 0.4 |
| Hispanic or Latino | 2016 | 13.7 | 13 | 14.4 | 0.4 |
| Hispanic or Latino | 2017 | 14.3 | 13.7 | 15 | 0.3 |
| Hispanic or Latino | 2018 | 13.8 | 13.2 | 14.5 | 0.3 |
| Hispanic or Latino | 2019 | 13.7 | 13 | 14.3 | 0.3 |
| Hispanic or Latino | 2020 | 13.3 | 12.7 | 13.9 | 0.3 |

Supplemental Table 5: Renal Failure and Malignant Neoplasm-related mortalities in older adults in the United States, 1999 to 2020, stratified by age group

| **Age Group** | **Year** | **Crude Rate** | **Crude Rate Lower 95% Confidence Interval** | **Crude Rate Upper 95% Confidence Interval** | **Crude Rate Standard Error** |
| --- | --- | --- | --- | --- | --- |
| 45-64 years | 1999 | 6 | 5.8 | 6.2 | 0.1 |
| 45-64 years | 2000 | 6.1 | 5.9 | 6.3 | 0.1 |
| 45-64 years | 2001 | 6.1 | 5.9 | 6.3 | 0.1 |
| 45-64 years | 2002 | 6 | 5.8 | 6.1 | 0.1 |
| 45-64 years | 2003 | 6 | 5.8 | 6.2 | 0.1 |
| 45-64 years | 2004 | 6.1 | 5.9 | 6.3 | 0.1 |
| 45-64 years | 2005 | 6.1 | 6 | 6.3 | 0.1 |
| 45-64 years | 2006 | 6.2 | 6 | 6.4 | 0.1 |
| 45-64 years | 2007 | 6.2 | 6 | 6.4 | 0.1 |
| 45-64 years | 2008 | 6.1 | 5.9 | 6.2 | 0.1 |
| 45-64 years | 2009 | 6.2 | 6 | 6.4 | 0.1 |
| 45-64 years | 2010 | 6.3 | 6.2 | 6.5 | 0.1 |
| 45-64 years | 2011 | 7 | 6.8 | 7.2 | 0.1 |
| 45-64 years | 2012 | 7 | 6.8 | 7.2 | 0.1 |
| 45-64 years | 2013 | 5.9 | 5.7 | 6 | 0.1 |
| 45-64 years | 2014 | 6 | 5.8 | 6.1 | 0.1 |
| 45-64 years | 2015 | 5.9 | 5.8 | 6.1 | 0.1 |
| 45-64 years | 2016 | 5.9 | 5.7 | 6.1 | 0.1 |
| 45-64 years | 2017 | 6.1 | 5.9 | 6.3 | 0.1 |
| 45-64 years | 2018 | 6.1 | 5.9 | 6.3 | 0.1 |
| 45-64 years | 2019 | 6.1 | 5.9 | 6.2 | 0.1 |
| 45-64 years | 2020 | 6.1 | 5.9 | 6.3 | 0.1 |
| 65-84 years | 1999 | 34.7 | 34 | 35.3 | 0.3 |
| 65-84 years | 2000 | 36.1 | 35.4 | 36.7 | 0.3 |
| 65-84 years | 2001 | 36.1 | 35.4 | 36.8 | 0.3 |
| 65-84 years | 2002 | 37.9 | 37.2 | 38.6 | 0.3 |
| 65-84 years | 2003 | 39.1 | 38.4 | 39.8 | 0.4 |
| 65-84 years | 2004 | 39.7 | 39 | 40.3 | 0.4 |
| 65-84 years | 2005 | 40.1 | 39.4 | 40.8 | 0.4 |
| 65-84 years | 2006 | 38.6 | 37.9 | 39.3 | 0.3 |
| 65-84 years | 2007 | 38.2 | 37.5 | 38.9 | 0.3 |
| 65-84 years | 2008 | 36.1 | 35.5 | 36.8 | 0.3 |
| 65-84 years | 2009 | 35.6 | 34.9 | 36.2 | 0.3 |
| 65-84 years | 2010 | 35.6 | 35 | 36.3 | 0.3 |
| 65-84 years | 2011 | 41.7 | 41 | 42.4 | 0.3 |
| 65-84 years | 2012 | 40.9 | 40.2 | 41.5 | 0.3 |
| 65-84 years | 2013 | 31.1 | 30.5 | 31.7 | 0.3 |
| 65-84 years | 2014 | 30.6 | 30.1 | 31.1 | 0.3 |
| 65-84 years | 2015 | 29.4 | 28.9 | 30 | 0.3 |
| 65-84 years | 2016 | 29.5 | 29 | 30 | 0.3 |
| 65-84 years | 2017 | 29.5 | 29 | 30 | 0.3 |
| 65-84 years | 2018 | 28.7 | 28.2 | 29.2 | 0.2 |
| 65-84 years | 2019 | 29.2 | 28.7 | 29.7 | 0.2 |
| 65-84 years | 2020 | 29.1 | 28.6 | 29.6 | 0.2 |
| 85+ years | 1999 | 81.2 | 78.5 | 84 | 1.4 |
| 85+ years | 2000 | 84.3 | 81.5 | 87.1 | 1.4 |
| 85+ years | 2001 | 84.9 | 82.1 | 87.6 | 1.4 |
| 85+ years | 2002 | 89.6 | 86.8 | 92.4 | 1.4 |
| 85+ years | 2003 | 92.2 | 89.4 | 95 | 1.4 |
| 85+ years | 2004 | 90.7 | 88 | 93.5 | 1.4 |
| 85+ years | 2005 | 94.4 | 91.7 | 97.2 | 1.4 |
| 85+ years | 2006 | 91.3 | 88.7 | 94 | 1.4 |
| 85+ years | 2007 | 92.1 | 89.4 | 94.7 | 1.4 |
| 85+ years | 2008 | 85.9 | 83.4 | 88.5 | 1.3 |
| 85+ years | 2009 | 84.4 | 81.9 | 86.9 | 1.3 |
| 85+ years | 2010 | 82.6 | 80.2 | 85 | 1.2 |
| 85+ years | 2011 | 106.3 | 103.6 | 108.9 | 1.4 |
| 85+ years | 2012 | 105.1 | 102.4 | 107.7 | 1.3 |
| 85+ years | 2013 | 78.9 | 76.7 | 81.2 | 1.1 |
| 85+ years | 2014 | 77.3 | 75.1 | 79.5 | 1.1 |
| 85+ years | 2015 | 76.7 | 74.5 | 78.8 | 1.1 |
| 85+ years | 2016 | 77.8 | 75.7 | 80 | 1.1 |
| 85+ years | 2017 | 75.7 | 73.6 | 77.9 | 1.1 |
| 85+ years | 2018 | 77.1 | 74.9 | 79.2 | 1.1 |
| 85+ years | 2019 | 77.2 | 75.1 | 79.4 | 1.1 |
| 85+ years | 2020 | 77.9 | 75.8 | 80 | 1.1 |

Supplemental Table 6: Renal Failure and Malignant Neoplasm-related mortalities in older adults in the United States, 1999 to 2020, stratified by urbanization

| **2013 Urbanization** | **Year** | **Age Adjusted Rate** | **Age Adjusted Rate Lower 95% Confidence Interval** | **Age Adjusted Rate Upper 95% Confidence Interval** | **Age Adjusted Rate Standard Error** |
| --- | --- | --- | --- | --- | --- |
| Metro | 1999 | 18.3 | 18 | 18.6 | 0.2 |
| Metro | 2000 | 18.9 | 18.6 | 19.2 | 0.2 |
| Metro | 2001 | 19 | 18.7 | 19.3 | 0.2 |
| Metro | 2002 | 19.7 | 19.4 | 20 | 0.2 |
| Metro | 2003 | 20.1 | 19.8 | 20.4 | 0.2 |
| Metro | 2004 | 20.1 | 19.8 | 20.4 | 0.2 |
| Metro | 2005 | 20.4 | 20.1 | 20.7 | 0.2 |
| Metro | 2006 | 20 | 19.7 | 20.3 | 0.2 |
| Metro | 2007 | 19.9 | 19.6 | 20.2 | 0.1 |
| Metro | 2008 | 18.9 | 18.6 | 19.2 | 0.1 |
| Metro | 2009 | 18.6 | 18.3 | 18.9 | 0.1 |
| Metro | 2010 | 18.7 | 18.4 | 19 | 0.1 |
| Metro | 2011 | 22 | 21.7 | 22.3 | 0.2 |
| Metro | 2012 | 21.9 | 21.6 | 22.2 | 0.1 |
| Metro | 2013 | 17 | 16.7 | 17.3 | 0.1 |
| Metro | 2014 | 16.9 | 16.7 | 17.2 | 0.1 |
| Metro | 2015 | 16.3 | 16 | 16.5 | 0.1 |
| Metro | 2016 | 16.4 | 16.2 | 16.7 | 0.1 |
| Metro | 2017 | 16.3 | 16.1 | 16.6 | 0.1 |
| Metro | 2018 | 16.1 | 15.9 | 16.4 | 0.1 |
| Metro | 2019 | 16.2 | 16 | 16.5 | 0.1 |
| Metro | 2020 | 16.1 | 15.9 | 16.3 | 0.1 |
| Non-Metro | 1999 | 19.4 | 18.8 | 20.1 | 0.3 |
| Non-Metro | 2000 | 20.1 | 19.4 | 20.7 | 0.3 |
| Non-Metro | 2001 | 20 | 19.4 | 20.7 | 0.3 |
| Non-Metro | 2002 | 20.3 | 19.6 | 20.9 | 0.3 |
| Non-Metro | 2003 | 21.2 | 20.5 | 21.8 | 0.3 |
| Non-Metro | 2004 | 21.7 | 21 | 22.3 | 0.3 |
| Non-Metro | 2005 | 22.1 | 21.5 | 22.8 | 0.3 |
| Non-Metro | 2006 | 20.9 | 20.3 | 21.6 | 0.3 |
| Non-Metro | 2007 | 21.1 | 20.5 | 21.8 | 0.3 |
| Non-Metro | 2008 | 20.2 | 19.6 | 20.8 | 0.3 |
| Non-Metro | 2009 | 20.9 | 20.3 | 21.5 | 0.3 |
| Non-Metro | 2010 | 20.6 | 20 | 21.2 | 0.3 |
| Non-Metro | 2011 | 25 | 24.3 | 25.6 | 0.3 |
| Non-Metro | 2012 | 24.1 | 23.4 | 24.8 | 0.3 |
| Non-Metro | 2013 | 18.6 | 18 | 19.2 | 0.3 |
| Non-Metro | 2014 | 18.5 | 18 | 19.1 | 0.3 |
| Non-Metro | 2015 | 18.8 | 18.2 | 19.4 | 0.3 |
| Non-Metro | 2016 | 18.6 | 18.1 | 19.2 | 0.3 |
| Non-Metro | 2017 | 19.1 | 18.5 | 19.7 | 0.3 |
| Non-Metro | 2018 | 18.2 | 17.7 | 18.8 | 0.3 |
| Non-Metro | 2019 | 18.6 | 18.1 | 19.2 | 0.3 |
| Non-Metro | 2020 | 19.5 | 18.9 | 20.1 | 0.3 |

Supplemental Table 7: Renal Failure and Malignant Neoplasm-related mortalities in older adults in the United States, 1999 to 2020, stratified by census region

| **Census Region** | **Year** | **Age Adjusted Rate** | **Age Adjusted Rate Lower 95% Confidence Interval** | **Age Adjusted Rate Upper 95% Confidence Interval** | **Age Adjusted Rate Standard Error** |
| --- | --- | --- | --- | --- | --- |
| Census Region 1: Northeast | 1999 | 18.7 | 18.1 | 19.3 | 0.3 |
| Census Region 1: Northeast | 2000 | 19.7 | 19.1 | 20.3 | 0.3 |
| Census Region 1: Northeast | 2001 | 20 | 19.4 | 20.7 | 0.3 |
| Census Region 1: Northeast | 2002 | 20.1 | 19.5 | 20.7 | 0.3 |
| Census Region 1: Northeast | 2003 | 20.6 | 20 | 21.2 | 0.3 |
| Census Region 1: Northeast | 2004 | 20.6 | 20 | 21.2 | 0.3 |
| Census Region 1: Northeast | 2005 | 20.8 | 20.2 | 21.4 | 0.3 |
| Census Region 1: Northeast | 2006 | 19.9 | 19.3 | 20.5 | 0.3 |
| Census Region 1: Northeast | 2007 | 20.3 | 19.7 | 20.9 | 0.3 |
| Census Region 1: Northeast | 2008 | 18.8 | 18.2 | 19.4 | 0.3 |
| Census Region 1: Northeast | 2009 | 18.3 | 17.7 | 18.9 | 0.3 |
| Census Region 1: Northeast | 2010 | 18.3 | 17.8 | 18.9 | 0.3 |
| Census Region 1: Northeast | 2011 | 21 | 20.4 | 21.6 | 0.3 |
| Census Region 1: Northeast | 2012 | 21 | 20.4 | 21.6 | 0.3 |
| Census Region 1: Northeast | 2013 | 16.5 | 16 | 17 | 0.3 |
| Census Region 1: Northeast | 2014 | 15.9 | 15.4 | 16.4 | 0.3 |
| Census Region 1: Northeast | 2015 | 15.4 | 14.9 | 15.9 | 0.3 |
| Census Region 1: Northeast | 2016 | 15.5 | 15 | 16 | 0.3 |
| Census Region 1: Northeast | 2017 | 14.6 | 14.2 | 15.1 | 0.2 |
| Census Region 1: Northeast | 2018 | 14.3 | 13.9 | 14.8 | 0.2 |
| Census Region 1: Northeast | 2019 | 14.7 | 14.3 | 15.2 | 0.2 |
| Census Region 1: Northeast | 2020 | 14.2 | 13.8 | 14.7 | 0.2 |
| Census Region 2: Midwest | 1999 | 19 | 18.4 | 19.6 | 0.3 |
| Census Region 2: Midwest | 2000 | 19.6 | 19 | 20.1 | 0.3 |
| Census Region 2: Midwest | 2001 | 19.3 | 18.7 | 19.9 | 0.3 |
| Census Region 2: Midwest | 2002 | 20.5 | 19.9 | 21.1 | 0.3 |
| Census Region 2: Midwest | 2003 | 21.2 | 20.6 | 21.7 | 0.3 |
| Census Region 2: Midwest | 2004 | 21.2 | 20.7 | 21.8 | 0.3 |
| Census Region 2: Midwest | 2005 | 21.1 | 20.5 | 21.7 | 0.3 |
| Census Region 2: Midwest | 2006 | 21 | 20.5 | 21.6 | 0.3 |
| Census Region 2: Midwest | 2007 | 20.9 | 20.4 | 21.5 | 0.3 |
| Census Region 2: Midwest | 2008 | 19.6 | 19 | 20.1 | 0.3 |
| Census Region 2: Midwest | 2009 | 19.7 | 19.1 | 20.2 | 0.3 |
| Census Region 2: Midwest | 2010 | 19.1 | 18.6 | 19.7 | 0.3 |
| Census Region 2: Midwest | 2011 | 23.3 | 22.7 | 23.9 | 0.3 |
| Census Region 2: Midwest | 2012 | 23.3 | 22.7 | 23.8 | 0.3 |
| Census Region 2: Midwest | 2013 | 17.2 | 16.7 | 17.7 | 0.3 |
| Census Region 2: Midwest | 2014 | 17.7 | 17.2 | 18.2 | 0.3 |
| Census Region 2: Midwest | 2015 | 16.9 | 16.4 | 17.4 | 0.2 |
| Census Region 2: Midwest | 2016 | 17 | 16.6 | 17.5 | 0.2 |
| Census Region 2: Midwest | 2017 | 17.1 | 16.6 | 17.6 | 0.2 |
| Census Region 2: Midwest | 2018 | 16.9 | 16.4 | 17.4 | 0.2 |
| Census Region 2: Midwest | 2019 | 17.2 | 16.8 | 17.7 | 0.2 |
| Census Region 2: Midwest | 2020 | 17.6 | 17.1 | 18 | 0.2 |
| Census Region 3: South | 1999 | 18.1 | 17.7 | 18.6 | 0.2 |
| Census Region 3: South | 2000 | 18.8 | 18.4 | 19.3 | 0.2 |
| Census Region 3: South | 2001 | 18.7 | 18.2 | 19.2 | 0.2 |
| Census Region 3: South | 2002 | 19.2 | 18.8 | 19.7 | 0.2 |
| Census Region 3: South | 2003 | 19.4 | 19 | 19.9 | 0.2 |
| Census Region 3: South | 2004 | 19.6 | 19.2 | 20.1 | 0.2 |
| Census Region 3: South | 2005 | 20.2 | 19.8 | 20.7 | 0.2 |
| Census Region 3: South | 2006 | 19.5 | 19.1 | 20 | 0.2 |
| Census Region 3: South | 2007 | 19.1 | 18.7 | 19.5 | 0.2 |
| Census Region 3: South | 2008 | 18.8 | 18.3 | 19.2 | 0.2 |
| Census Region 3: South | 2009 | 18.6 | 18.2 | 19.1 | 0.2 |
| Census Region 3: South | 2010 | 19.2 | 18.8 | 19.7 | 0.2 |
| Census Region 3: South | 2011 | 21.9 | 21.5 | 22.4 | 0.2 |
| Census Region 3: South | 2012 | 21.4 | 21 | 21.9 | 0.2 |
| Census Region 3: South | 2013 | 17.1 | 16.7 | 17.5 | 0.2 |
| Census Region 3: South | 2014 | 16.9 | 16.5 | 17.3 | 0.2 |
| Census Region 3: South | 2015 | 16.4 | 16.1 | 16.8 | 0.2 |
| Census Region 3: South | 2016 | 16.6 | 16.3 | 17 | 0.2 |
| Census Region 3: South | 2017 | 16.7 | 16.3 | 17 | 0.2 |
| Census Region 3: South | 2018 | 16.6 | 16.2 | 16.9 | 0.2 |
| Census Region 3: South | 2019 | 16.9 | 16.6 | 17.3 | 0.2 |
| Census Region 3: South | 2020 | 16.8 | 16.5 | 17.2 | 0.2 |
| Census Region 4: West | 1999 | 18.4 | 17.8 | 19 | 0.3 |
| Census Region 4: West | 2000 | 18.5 | 17.9 | 19.1 | 0.3 |
| Census Region 4: West | 2001 | 18.8 | 18.2 | 19.4 | 0.3 |
| Census Region 4: West | 2002 | 19.4 | 18.8 | 20 | 0.3 |
| Census Region 4: West | 2003 | 20.3 | 19.6 | 20.9 | 0.3 |
| Census Region 4: West | 2004 | 20.6 | 20 | 21.2 | 0.3 |
| Census Region 4: West | 2005 | 21 | 20.3 | 21.6 | 0.3 |
| Census Region 4: West | 2006 | 20.4 | 19.8 | 21 | 0.3 |
| Census Region 4: West | 2007 | 20.5 | 19.9 | 21.1 | 0.3 |
| Census Region 4: West | 2008 | 19.5 | 18.9 | 20.1 | 0.3 |
| Census Region 4: West | 2009 | 19.6 | 19.1 | 20.2 | 0.3 |
| Census Region 4: West | 2010 | 19.3 | 18.7 | 19.8 | 0.3 |
| Census Region 4: West | 2011 | 24 | 23.4 | 24.6 | 0.3 |
| Census Region 4: West | 2012 | 23.9 | 23.3 | 24.5 | 0.3 |
| Census Region 4: West | 2013 | 18.2 | 17.7 | 18.7 | 0.3 |
| Census Region 4: West | 2014 | 18.2 | 17.7 | 18.7 | 0.3 |
| Census Region 4: West | 2015 | 18 | 17.5 | 18.5 | 0.3 |
| Census Region 4: West | 2016 | 17.8 | 17.4 | 18.3 | 0.2 |
| Census Region 4: West | 2017 | 18.2 | 17.7 | 18.7 | 0.2 |
| Census Region 4: West | 2018 | 17.6 | 17.2 | 18.1 | 0.2 |
| Census Region 4: West | 2019 | 17.2 | 16.8 | 17.7 | 0.2 |
| Census Region 4: West | 2020 | 17.5 | 17.1 | 18 | 0.2 |

Supplemental Table 8: Renal Failure and Malignant Neoplasm-related mortalities in older adults in the United States, 1999 to 2020, stratified by states

| **State** | **Deaths** | **Age Adjusted Rate** | **Age Adjusted Rate Lower 95% Confidence Interval** | **Age Adjusted Rate Upper 95% Confidence Interval** | **Age Adjusted Rate Standard Error** |
| --- | --- | --- | --- | --- | --- |
| Alabama | 7217 | 17.5 | 17.1 | 17.9 | 0.2 |
| Alaska | 753 | 20.8 | 19.2 | 22.4 | 0.8 |
| Arizona | 6744 | 12.3 | 12 | 12.6 | 0.2 |
| Arkansas | 4962 | 19.2 | 18.7 | 19.7 | 0.3 |
| California | 62328 | 22.3 | 22.1 | 22.4 | 0.1 |
| Colorado | 5940 | 16.7 | 16.2 | 17.1 | 0.2 |
| Connecticut | 5916 | 17.7 | 17.3 | 18.2 | 0.2 |
| Delaware | 1583 | 19.6 | 18.6 | 20.6 | 0.5 |
| District of Columbia | 1296 | 28.2 | 26.7 | 29.7 | 0.8 |
| Florida | 26399 | 13 | 12.9 | 13.2 | 0.1 |
| Georgia | 10626 | 15.8 | 15.5 | 16.1 | 0.2 |
| Hawaii | 2113 | 16.9 | 16.2 | 17.6 | 0.4 |
| Idaho | 2063 | 17 | 16.2 | 17.7 | 0.4 |
| Illinois | 18872 | 18.1 | 17.8 | 18.3 | 0.1 |
| Indiana | 11791 | 21.9 | 21.5 | 22.3 | 0.2 |
| Iowa | 5274 | 17.8 | 17.4 | 18.3 | 0.2 |
| Kansas | 4623 | 18.8 | 18.2 | 19.3 | 0.3 |
| Kentucky | 7976 | 22 | 21.5 | 22.5 | 0.2 |
| Louisiana | 5577 | 15.4 | 15 | 15.8 | 0.2 |
| Maine | 2556 | 19.1 | 18.3 | 19.8 | 0.4 |
| Maryland | 10112 | 21.8 | 21.3 | 22.2 | 0.2 |
| Massachusetts | 11344 | 19 | 18.6 | 19.3 | 0.2 |
| Michigan | 15573 | 17.8 | 17.5 | 18.1 | 0.1 |
| Minnesota | 9081 | 20.1 | 19.7 | 20.6 | 0.2 |
| Mississippi | 4928 | 20.3 | 19.8 | 20.9 | 0.3 |
| Missouri | 10007 | 18.9 | 18.5 | 19.3 | 0.2 |
| Montana | 1324 | 14.3 | 13.5 | 15.1 | 0.4 |
| Nebraska | 3577 | 22.2 | 21.5 | 22.9 | 0.4 |
| Nevada | 2929 | 14.4 | 13.9 | 15 | 0.3 |
| New Hampshire | 2211 | 19.1 | 18.3 | 19.9 | 0.4 |
| New Jersey | 14773 | 19.1 | 18.8 | 19.4 | 0.2 |
| New Mexico | 2411 | 14.3 | 13.7 | 14.8 | 0.3 |
| New York | 25114 | 14.7 | 14.6 | 14.9 | 0.1 |
| North Carolina | 15569 | 20.1 | 19.7 | 20.4 | 0.2 |
| North Dakota | 1648 | 25.4 | 24.2 | 26.7 | 0.6 |
| Ohio | 21055 | 20.3 | 20 | 20.6 | 0.1 |
| Oklahoma | 6091 | 19.3 | 18.8 | 19.8 | 0.2 |
| Oregon | 6100 | 17.8 | 17.3 | 18.2 | 0.2 |
| Pennsylvania | 25957 | 20.6 | 20.3 | 20.8 | 0.1 |
| Rhode Island | 2192 | 21.6 | 20.7 | 22.5 | 0.5 |
| South Carolina | 8282 | 21 | 20.5 | 21.5 | 0.2 |
| South Dakota | 1610 | 20.9 | 19.9 | 22 | 0.5 |
| Tennessee | 10342 | 19.4 | 19 | 19.8 | 0.2 |
| Texas | 37916 | 22.3 | 22 | 22.5 | 0.1 |
| Utah | 2504 | 15.9 | 15.2 | 16.5 | 0.3 |
| Vermont | 1143 | 19.7 | 18.6 | 20.9 | 0.6 |
| Virginia | 10700 | 17.1 | 16.8 | 17.4 | 0.2 |
| Washington | 10901 | 20.2 | 19.8 | 20.6 | 0.2 |
| West Virginia | 4171 | 22.7 | 22 | 23.4 | 0.4 |
| Wisconsin | 8892 | 17.5 | 17.1 | 17.9 | 0.2 |
| Wyoming | 672 | 14.9 | 13.8 | 16.1 | 0.6 |

Supplemental Table 9: Renal Failure and Malignant Neoplasm-related mortalities in older adults in the United States, 1999 to 2020, stratified by cancer region

| **Year** | **C15–C26 Malignant neoplasms of digestive organs** | | **C30–C39 Malignant neoplasms of respiratory and intrathoracic organs** | | **C51–C68 Malignant neoplasms of Genitourninary organs** | | **C81–C96 Malignant neoplasms of lymphoid, hematopoietic, and related tissue** | |
| --- | --- | --- | --- | --- | --- | --- | --- | --- |
|  | **Deaths** | **AAMR** | **Deaths** | **AAMR** | **Deaths** | **AAMR** | **Deaths** | **AAMR** |
| 1999 | 3442 | 3.6 | 2010 | 2.1 | 5350 | 5.6 | 3994 | 4.2 |
| 2000 | 3650 | 3.8 | 2264 | 2.3 | 5655 | 5.9 | 4050 | 4.2 |
| 2001 | 3747 | 3.8 | 2399 | 2.5 | 5518 | 5.6 | 4203 | 4.3 |
| 2002 | 3775 | 3.8 | 2508 | 2.5 | 5822 | 5.9 | 4379 | 4.4 |
| 2003 | 4027 | 4 | 2602 | 2.6 | 5834 | 5.8 | 4712 | 4.7 |
| 2004 | 4272 | 4.1 | 2774 | 2.7 | 5855 | 5.7 | 4615 | 4.5 |
| 2005 | 4410 | 4.2 | 3006 | 2.9 | 6215 | 6 | 4565 | 4.3 |
| 2006 | 4307 | 4 | 2924 | 2.8 | 6035 | 5.6 | 4564 | 4.3 |
| 2007 | 4543 | 4.1 | 3005 | 2.8 | 6071 | 5.6 | 4589 | 4.2 |
| 2008 | 4520 | 4 | 2975 | 2.7 | 5740 | 5.2 | 4439 | 4 |
| 2009 | 4708 | 4.1 | 3167 | 2.8 | 5789 | 5.1 | 4343 | 3.8 |
| 2010 | 4748 | 4.1 | 3232 | 2.8 | 5973 | 5.2 | 4408 | 3.8 |
| 2011 | 5788 | 4.8 | 4055 | 3.4 | 6843 | 5.8 | 5269 | 4.4 |
| 2012 | 5954 | 4.8 | 4012 | 3.3 | 6859 | 5.6 | 5419 | 4.5 |
| 2013 | 4714 | 3.7 | 3010 | 2.4 | 5399 | 4.3 | 4500 | 3.7 |
| 2014 | 4827 | 3.7 | 3033 | 2.4 | 5460 | 4.3 | 4747 | 3.8 |
| 2015 | 4818 | 3.6 | 3050 | 2.3 | 5466 | 4.2 | 4620 | 3.5 |
| 2016 | 4986 | 3.7 | 3094 | 2.3 | 5734 | 4.3 | 4572 | 3.4 |
| 2017 | 5144 | 3.7 | 3143 | 2.3 | 5786 | 4.2 | 4715 | 3.4 |
| 2018 | 5293 | 3.7 | 3049 | 2.2 | 5874 | 4.2 | 4713 | 3.4 |
| 2019 | 5479 | 3.8 | 3226 | 2.2 | 5878 | 4.1 | 4687 | 3.3 |
| 2020 | 5649 | 3.8 | 3302 | 2.2 | 6079 | 4.2 | 4718 | 3.2 |
| Totals | 102801 | 3.9 | 65840 | 2.5 | 129235 | 5 | 100821 | 3.9 |

Supplemental Table 10: Average Annual Percentage Change (AAPC) and Annual Percentage Change (APC) for all variables

| **Average and Annual Percentage Change (APC + AAPC) + 95% Cis** | | | | | | |
| --- | --- | --- | --- | --- | --- | --- |
| **Variable** | **Segment Start** | **Segment End** | **APC** | **APC 95% LCL** | **APC 95% UCL** | **P-Value** |
| **Overall** | | | | | | |
| **Overall** | 1999 | 2012 | 0.7059 | -0.0145 | 1.4314 | 0.054186 |
| **Overall** | 2012 | 2015 | -8.0896 | -21.4414 | 7.5315 | 0.268371 |
| **Overall** | 2015 | 2020 | 0.7171 | -2.8585 | 4.4243 | 0.67803 |
| **Overall-AAPC** | 1999 | 2020 | -0.5977 | -2.792 | 1.646 | 0.598599 |
| **Sex** | | | | | | |
| **Female** | 1999 | 2005 | 2.0213 | -1.4617 | 5.6274 | 0.240811 |
| **Female** | 2005 | 2020 | -1.2554 | -1.888 | -0.6187 | 0.000674 |
| **Male** | 1999 | 2005 | 1.4698 | -2.2024 | 5.2799 | 0.415228 |
| **Male** | 2005 | 2020 | -2.2773 | -3.0762 | -1.4717 | 0.000017 |
| **Female-AAPC** | 1999 | 2020 | -0.3301 | -1.3374 | 0.6876 | 0.523532 |
| **Male-AAPC** | 1999 | 2020 | -1.221 | -2.321 | -0.1087 | 0.031531 |
| **Race/Ethnicity** | | | | | | |
| **American Indian or Alaska Native** | 1999 | 2020 | -1.9445 | -2.9656 | -0.9127 | 0.000862 |
| **Asian or Pacific Islander** | 1999 | 2012 | 0.3092 | -0.7555 | 1.3855 | 0.544864 |
| **Asian or Pacific Islander** | 2012 | 2015 | -11.9063 | -26.6303 | 5.7726 | 0.159281 |
| **Asian or Pacific Islander** | 2015 | 2020 | 0.6136 | -2.9895 | 4.3505 | 0.724395 |
| **Black or African American** | 1999 | 2012 | -0.378 | -1.2776 | 0.5299 | 0.385762 |
| **Black or African American** | 2012 | 2015 | -10.3327 | -24.5243 | 6.5273 | 0.196053 |
| **Black or African American** | 2015 | 2020 | -0.0504 | -3.6605 | 3.695 | 0.976965 |
| **White** | 1999 | 2011 | 0.7152 | -0.325 | 1.7663 | 0.165726 |
| **White** | 2011 | 2020 | -2.7586 | -4.3357 | -1.1555 | 0.002165 |
| **Hispanic or Latino** | 1999 | 2007 | 1.3004 | -1.6288 | 4.3168 | 0.365902 |
| **Hispanic or Latino** | 2007 | 2020 | -2.4516 | -3.5304 | -1.3608 | 0.000202 |
| **American Indian or Alaska Native-AAPC** | 1999 | 2020 | -1.9445 | -2.9656 | -0.9127 | 0.000862 |
| **Asian or Pacific Islander-AAPC** | 1999 | 2020 | -1.4634 | -3.9802 | 1.1194 | 0.264115 |
| **Black or African American-AAPC** | 1999 | 2020 | -1.7883 | -4.1576 | 0.6395 | 0.14753 |
| **White-AAPC** | 1999 | 2020 | -0.7885 | -1.6311 | 0.0614 | 0.06891 |
| **Hispanic or Latino-AAPC** | 1999 | 2020 | -1.039 | -2.2385 | 0.1753 | 0.093249 |
| **Age Group** | | | | | | |
| **45-64 years** | 1999 | 2020 | 0.0525 | -0.3065 | 0.4128 | 0.763735 |
| **65-84 years** | 1999 | 2012 | 0.5146 | -0.2476 | 1.2826 | 0.170097 |
| **65-84 years** | 2012 | 2015 | -9.915 | -24.2464 | 7.1277 | 0.217107 |
| **65-84 years** | 2015 | 2020 | 0.5651 | -2.767 | 4.0115 | 0.725167 |
| **85+ years** | 1999 | 2020 | -0.7531 | -1.4542 | -0.0471 | 0.037774 |
| **45-64 years-AAPC** | 1999 | 2020 | 0.0525 | -0.3065 | 0.4128 | 0.763735 |
| **65-84 years-AAPC** | 1999 | 2020 | -1.0343 | -3.3972 | 1.3863 | 0.399057 |
| **85+ years-AAPC** | 1999 | 2020 | -0.7531 | -1.4542 | -0.0471 | 0.037774 |
| **Urbanization** | | | | | | |
| **Metropolitan** | 1999 | 2012 | 0.4931 | -0.2789 | 1.2711 | 0.192832 |
| **Metropolitan** | 2012 | 2015 | -7.3476 | -16.3149 | 2.5806 | 0.130156 |
| **Metropolitan** | 2015 | 2020 | 0.3515 | -2.0031 | 2.7626 | 0.755968 |
| **Nonmetropolitan** | 1999 | 2012 | 1.109 | 0.2874 | 1.9373 | 0.01166 |
| **Nonmetropolitan** | 2012 | 2015 | -7.681 | -22.7035 | 10.2611 | 0.350846 |
| **Nonmetropolitan** | 2015 | 2020 | 1.441 | -2.4146 | 5.4489 | 0.441627 |
| **Metropolitan-AAPC** | 1999 | 2020 | -0.6997 | -2.1693 | 0.792 | 0.355995 |
| **Nonmetropolitan-AAPC** | 1999 | 2020 | -0.1183 | -2.594 | 2.4204 | 0.926372 |
| **Census Region** | | | | | | |
| **Northeast** | 1999 | 2012 | -0.0313 | -0.758 | 0.7007 | 0.92791 |
| **Northeast** | 2012 | 2015 | -9.0238 | -23.0708 | 7.5882 | 0.246527 |
| **Northeast** | 2015 | 2020 | -0.8378 | -3.9387 | 2.3632 | 0.579063 |
| **Midwest** | 1999 | 2012 | 0.7543 | -0.0624 | 1.5776 | 0.067664 |
| **Midwest** | 2012 | 2015 | -8.4907 | -23.6132 | 9.6257 | 0.309928 |
| **Midwest** | 2015 | 2020 | 1.0743 | -1.6381 | 3.8614 | 0.413663 |
| **South** | 1999 | 2012 | 0.7236 | 0.1031 | 1.3479 | 0.025355 |
| **South** | 2012 | 2015 | -7.6795 | -19.2863 | 5.5963 | 0.22288 |
| **South** | 2015 | 2020 | 1.2331 | -1.8124 | 4.3731 | 0.403991 |
| **West** | 1999 | 2011 | 1.2112 | 0.024 | 2.4125 | 0.046002 |
| **West** | 2011 | 2020 | -2.84 | -4.2721 | -1.3866 | 0.000757 |
| **Northeast-AAPC** | 1999 | 2020 | -1.5585 | -3.8283 | 0.7649 | 0.186931 |
| **Midwest-AAPC** | 1999 | 2020 | -0.5465 | -2.9772 | 1.9451 | 0.66426 |
| **South-AAPC** | 1999 | 2020 | -0.4026 | -2.2849 | 1.516 | 0.678597 |
| **West-AAPC** | 1999 | 2020 | -0.5453 | -1.3983 | 0.315 | 0.213366 |
| **Cancer Regions** | | | | | | |
| **Digestive Organs** | 1999 | 2012 | 1.5851 | 0.9302 | 2.2442 | 0.000131 |
| **Digestive Organs** | 2012 | 2015 | -7.9852 | -19.5996 | 5.3069 | 0.207089 |
| **Digestive Organs** | 2015 | 2020 | 1.8694 | -1.119 | 4.948 | 0.203443 |
| **Respiratory and Intrathoracic Organs** | 1999 | 2012 | 2.4929 | 1.5744 | 3.4198 | 0.000041 |
| **Respiratory and Intrathoracic Organs** | 2012 | 2015 | -11.4359 | -26.7216 | 7.0384 | 0.1908 |
| **Respiratory and Intrathoracic Organs** | 2015 | 2020 | 0.1239 | -4.302 | 4.7544 | 0.954002 |
| **Genitourinary Organs** | 1999 | 2012 | -0.6847 | -1.3366 | -0.0285 | 0.042012 |
| **Genitourinary Organs** | 2012 | 2015 | -8.6333 | -22.3835 | 7.5528 | 0.25486 |
| **Genitourinary Organs** | 2015 | 2020 | 0.6255 | -3.0371 | 4.4264 | 0.723704 |
| **Lymphoid, Hematopoietic, and related tissue** | 1999 | 2003 | 3.0217 | 1.7501 | 4.3092 | 0.000556 |
| **Lymphoid, Hematopoietic, and related tissue** | 2003 | 2009 | -3.0301 | -3.8877 | -2.1649 | 0.000044 |
| **Lymphoid, Hematopoietic, and related tissue** | 2009 | 2012 | 4.5031 | 0.2592 | 8.9266 | 0.039939 |
| **Lymphoid, Hematopoietic, and related tissue** | 2012 | 2015 | -7.7323 | -11.7902 | -3.4876 | 0.003316 |
| **Lymphoid, Hematopoietic, and related tissue** | 2015 | 2020 | -1.1724 | -2.2923 | -0.0397 | 0.044106 |
| **Digestive Organs-AAPC** | 1999 | 2020 | 0.2259 | -1.6723 | 2.1608 | 0.817085 |
| **Respiratory and Intrathoracic Organs-AAPC** | 1999 | 2020 | -0.1809 | -2.8498 | 2.5612 | 0.895792 |
| **Genitourinary Organs-AAPC** | 1999 | 2020 | -1.5545 | -3.7999 | 0.7432 | 0.183212 |
| **Lymphoid, Hematopoietic, and related tissue-AAPC** | 1999 | 2020 | -1.1071 | -1.9262 | -0.2812 | 0.008704 |
